# Supplementary material for: How Participatory Music Engagement Supports Mental Well-being: A Meta-Ethnography
Source: PubMed Central journal article supplement (PMC7502980; doi:10.1177/1049732320944142), 2020-08-05
Supplement: sj-pdf-1-qhr-10.1177_1049732320944142.pdf [file sj-pdf-1-qhr-10.1177_1049732320944142.pdf]

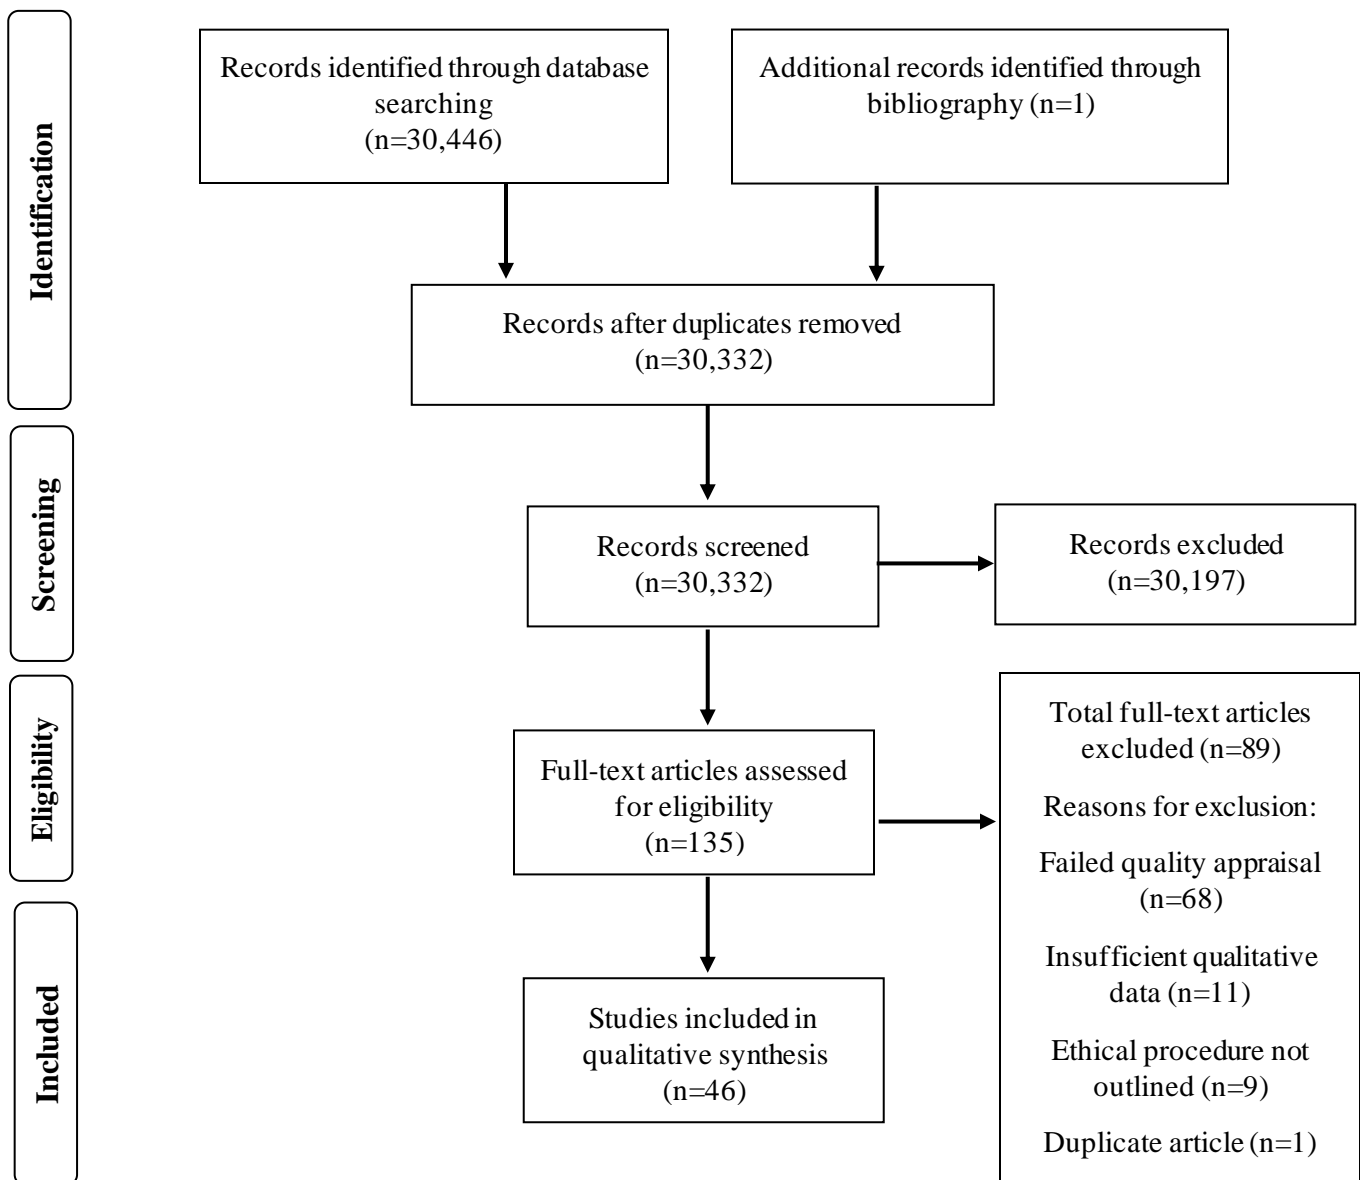

Supplementary Figure 1. Article selection flow diagram
