# Supplementary material for: How Participatory Music Engagement Supports Mental Well-being: A Meta-Ethnography
Source: PubMed Central journal article supplement (PMC7502980; doi:10.1177/1049732320944142), 2020-08-05
Supplement: sj-pdf-3-qhr-10.1177_1049732320944142.pdf [file sj-pdf-3-qhr-10.1177_1049732320944142.pdf]

Supplementary Table 1. Search terms.

| <b>Music engagement</b> | <b>AND</b> | <b>Mental wellbeing</b> | <b>AND</b> | <b>Qualitative data</b>  |
|-------------------------|------------|-------------------------|------------|--------------------------|
| Music OR                |            | Wellness OR             |            | Subjective Well Being OR |
| Music-Making OR Sing    |            | Wellbeing OR            |            | Subjective Well-Being OR |
| OR                      |            | Well-Being OR           |            | SWB OR                   |
| Singing OR              |            | Mental Health OR        |            | Subjective OR            |
| Song Writing OR Song-   |            | Eudaimonic OR           |            | Perspective OR           |
| Writing OR Choirs OR    |            | Eudaimonia OR           |            | Perspectives OR          |
| Orchestras OR           |            | Eudaemonic OR           |            | Standpoint OR            |
| Music Groups            |            | Eudaemonia OR           |            | Standpoints OR           |
|                         |            | Eudemonic OR            |            | Point of View OR         |
|                         |            | Eudemonia OR            |            | Qualitative OR           |
|                         |            | Hedonic OR              |            | Interview OR             |
|                         |            | Hedonism OR             |            | Interviews OR            |
|                         |            | Hedonistic OR           |            | Focus Group OR           |
|                         |            | Social OR               |            | Observation OR           |
|                         |            | Mood OR                 |            | Outlook OR               |
|                         |            | Benefit OR              |            | Viewpoint OR             |
|                         |            | Stress OR               |            | Stance OR                |
|                         |            | Mental Illness OR       |            | Attitude OR              |
|                         |            | Depression OR           |            | Understanding OR         |
|                         |            | Anxiety OR              |            | Conscious OR             |
|                         |            | Patient                 |            | Themes OR                |
|                         |            |                         |            | Grounded                 |
